# Supplementary material
Source: MDPI journal article supplement (https://www.mdpi.com/2227-9717/9/11/2059)
Supplement: s1 [file s1]

## Supplementary materials

**Table S1.** Feed forward networks with different hidden layer neurons

**Figure S1.** Effect of independent variables on  $\text{NH}_3\text{-N}$  removal under RSM conditions of pH (9–11), temperature (58–70 °C), and time (30–90 min)

**Table S1.** Feed forward networks with different hidden layer neurons

| Sl. No. | Topology | Transfer function (Tan-sigmoidal) |          |            |       |       |
|---------|----------|-----------------------------------|----------|------------|-------|-------|
|         |          | MSE                               | R        |            |       |       |
|         |          |                                   | Training | Validation | Test  | All   |
| 1       | 3:01:02  | 13.028                            | 0.992    | 0.993      | 0.995 | 0.999 |
| 2       | 3:02:02  | 13.668                            | 0.991    | 0.994      | 1.000 | 0.992 |
| 3       | 3:03:02  | 12.867                            | 0.992    | 0.996      | 0.996 | 0.993 |
| 4       | 3:04:02  | 8.386                             | 0.996    | 0.998      | 0.993 | 0.995 |
| 5       | 3:05:02  | 7.728                             | 0.998    | 0.999      | 0.999 | 0.998 |
| 6       | 3:06:02  | 11.359                            | 0.999    | 0.995      | 0.999 | 0.994 |
| 7       | 3:07:02  | 10.388                            | 0.996    | 0.997      | 0.998 | 0.994 |
| 8       | 3:08:02  | 8.934                             | 0.995    | 0.994      | 0.999 | 0.995 |
| 9       | 3:09:02  | 10.081                            | 1.000    | 0.981      | 0.993 | 0.994 |
| 10      | 3:10:02  | 8.533                             | 0.995    | 0.996      | 0.997 | 0.995 |
| 11      | 3:11:02  | 8.307                             | 0.995    | 0.997      | 0.995 | 0.995 |
| 12      | 3:12:02  | 7.871                             | 0.995    | 0.996      | 0.996 | 0.996 |
| 13      | 3:13:02  | 12.689                            | 0.998    | 0.989      | 0.996 | 0.997 |
| 14      | 3:14:02  | 12.297                            | 0.998    | 0.998      | 0.998 | 0.998 |
| 15      | 3:15:02  | 18.443                            | 0.999    | 0.990      | 0.992 | 0.997 |
| 16      | 3:16:02  | 9.724                             | 0.999    | 0.991      | 0.999 | 0.998 |
| 17      | 3:17:02  | 8.174                             | 0.999    | 0.998      | 0.993 | 0.998 |
| 18      | 3:18:02  | 10.563                            | 0.999    | 0.987      | 0.996 | 0.997 |
| 19      | 3:19:02  | 12.346                            | 0.998    | 0.994      | 0.972 | 0.999 |
| 20      | 3:20:02  | 19.924                            | 0.992    | 0.983      | 0.984 | 0.989 |

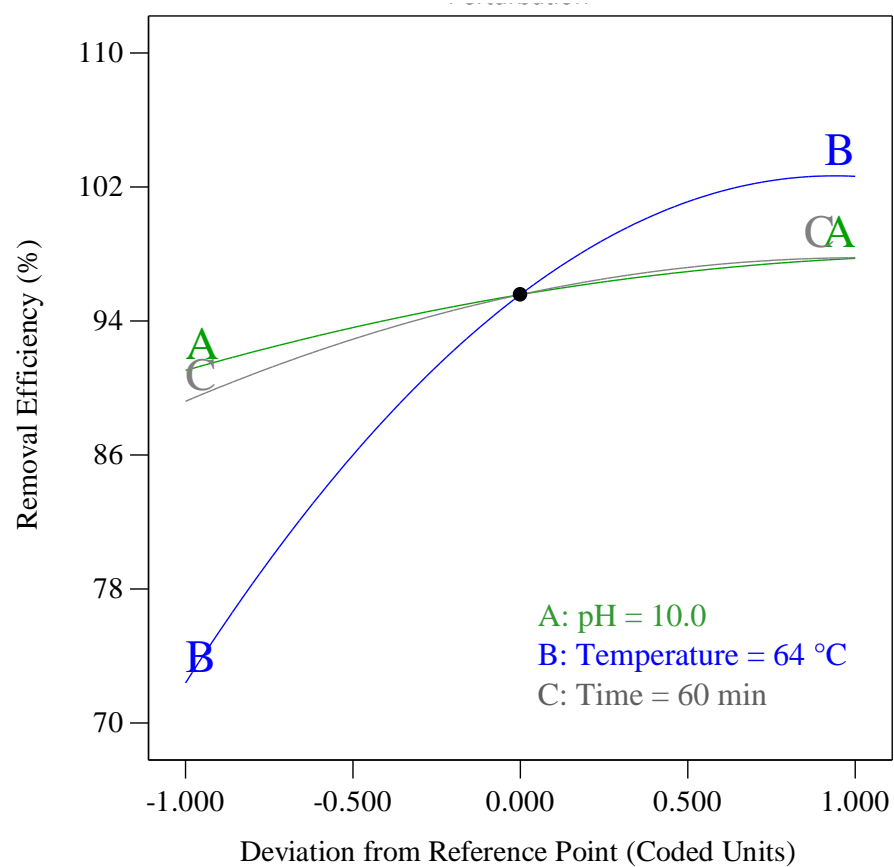

**Figure S1.** Effect of independent variables on  $\text{NH}_3\text{-N}$  removal under RSM conditions of pH (9–11), temperature (58–70 °C), and time (30–90 min)
